# Supplementary material
Source: publisher site journal article supplement (https://www.dovepress.com/get_supplementary_file.php?f=470470.docx)
Supplement: Supplementary file 1 [file get_supplementary_file.php]

Supplementary Material

### Table S1. Markov inputs in cost-effectiveness analysis.

| **Variable** | **Baseline value** | **Range low** | **Range high** | **Distribution** | **Reference** |
| --- | --- | --- | --- | --- | --- |
| **Survival input** |  |  |  |  |  |
| HR of SoraHAIC vs sorafenib for OS | 0.280 | 0.150 | 0.530 | Normal | [1] |
| HR of SoraHAIC vs sorafenib for PFS | 0.260 | 0.150 | 0.470 | Normal | [1] |
| Weibull OS survival model with SoraHAIC | λ 0.0276456, γ 1.1106779 |  |  |  | [1] |
| Weibull PFS survival model with SoraHAIC | λ 0.02240, γ 1.58486 |  |  |  | [1] |
| Weibull OS survival model with Sorafenib | λ 0.0535377, γ 1.4243262 |  |  |  | [1] |
| Weibull PFS survival model with Sorafenib | λ 0.172516, γ 1.291220 |  |  |  | [1] |
| **Utility input** |  |  |  |  |  |
| utility of PFS | 0.760 | 0.610 | 0.910 | Beta | [2] |
| utility of PD | 0.680 | 0.540 | 0.820 | Beta | [2] |
| disutility due to neutropenia | 0.090 | 0.006 | 0.120 | Beta | [3] |
| disutility due to fatigue | 0.073 | 0.037 | 0.110 | Beta | [3] |
| **Cost input** |  |  |  |  |  |
| sorafenib (per month) | 3077.760 | 2462.208 | 3693.312 | Gamma | [2] |
| oxaliplatin (per month) | 364.413 | 291.531 | 437.296 | Gamma | [2] |
| cisplatin (per month) | 14.310 | 11.448 | 17.172 | Gamma | [4] |
| fluorouracil (per month) | 686.200 | 548.960 | 823.440 | Gamma | [2] |
| leucovorin (per month) | 31.653 | 25.323 | 37.984 | Gamma | [2] |
| HAIC procedure | 2422.707 | 1938.165 | 2907.248 | Gamma | [2] |
| hospitalization (per month) | 502.560 | 402.048 | 603.072 | Gamma | [2] |
| test (per month) | 469.587 | 375.669 | 563.504 | Gamma | [2] |
| second_line (per month) | 959.160 | 767.328 | 1150.992 | Gamma | [5] |
| hypertension | 1.350 | 1.080 | 1.620 | Gamma | [5] |
| elevated total bilirubin | 113.530 | 90.824 | 136.236 | Gamma | [5] |
| neutropenia | 82.390 | 65.912 | 98.868 | Gamma | [2] |
| fatigue | 64.120 | 51.296 | 76.944 | Gamma | [6] |
| elevated AST | 42.540 | 34.032 | 51.048 | Gamma | [2] |
| thrombocytopenia | 1054.220 | 843.376 | 1265.064 | Gamma | [6] |
| **Incidence of adverse event** |  |  |  |  |  |
| hypertension with sorafenib | 0.000 | 0.000 | 0.050 | Beta | [1] |
| elevated total bilirubin with sorafenib | 0.000 | 0.000 | 0.050 | Beta | [1] |
| neutropenia with sorafenib | 0.000 | 0.000 | 0.050 | Beta | [1] |
| fatigue with sorafenib | 0.031 | 0.025 | 0.038 | Beta | [1] |
| elevated AST with sorafenib | 0.031 | 0.025 | 0.038 | Beta | [1] |
| thrombocytopenia with sorafenib | 0.000 | 0.000 | 0.050 | Beta | [1] |
| hypertension with SoraHAIC | 0.031 | 0.025 | 0.038 | Beta | [1] |
| elevated total bilirubin with SoraHAIC | 0.031 | 0.025 | 0.038 | Beta | [1] |
| neutropenia with SoraHAIC | 0.000 | 0.000 | 0.050 | Beta | [1] |
| fatigue with SoraHAIC | 0.031 | 0.025 | 0.038 | Beta | [1] |
| elevated AST with SoraHAIC | 0.063 | 0.050 | 0.075 | Beta | [1] |
| thrombocytopenia with SoraHAIC | 0.219 | 0.175 | 0.263 | Beta | [1] |
| **Body surface area** | 1.720 | 1.380 | 2.060 | Normal | [2] |
| **Discount rate** | 0.030 | 0.000 | 0.050 | Fixed | [2] |

HR, hazard ratio. HAIC, hepatic arterial infusion chemotherapy. OS, overall survival. PFS, progression free survival. PD, progression disease. AST, aspartate aminotransferase.

**References:**

1. Zheng, K., et al., *Sorafenib Plus Hepatic Arterial Infusion Chemotherapy versus Sorafenib for Hepatocellular Carcinoma with Major Portal Vein Tumor Thrombosis: A Randomized Trial.* Radiology, 2022. **303**(2): p. 455-464.

2. Li, M., et al., *Cost-Effectiveness Analysis of Hepatic Arterial Infusion of FOLFOX Combined Sorafenib for Advanced Hepatocellular Carcinoma With Portal Vein Invasion.* Front Oncol, 2021. **11**: p. 562135.

3. Nafees, B., et al., *Health state utilities for non small cell lung cancer.* Health Qual Life Outcomes, 2008. **6**: p. 84.

4. Zhao, Q., et al., *Cost-effectiveness analysis of adding durvalumab to chemotherapy as first-line treatment for advanced biliary tract cancer based on the TOPAZ-1 trial.* Cost Eff Resour Alloc, 2023. **21**(1): p. 19.

5. Wen, F., et al., *Atezolizumab and bevacizumab combination compared with sorafenib as the first-line systemic treatment for patients with unresectable hepatocellular carcinoma: A cost-effectiveness analysis in China and the United states.* Liver Int, 2021. **41**(5): p. 1097-1104.

6. Wong, W., et al., *Assessment of costs associated with adverse events in patients with cancer.* PLoS One, 2018. **13**(4): p. e0196007.


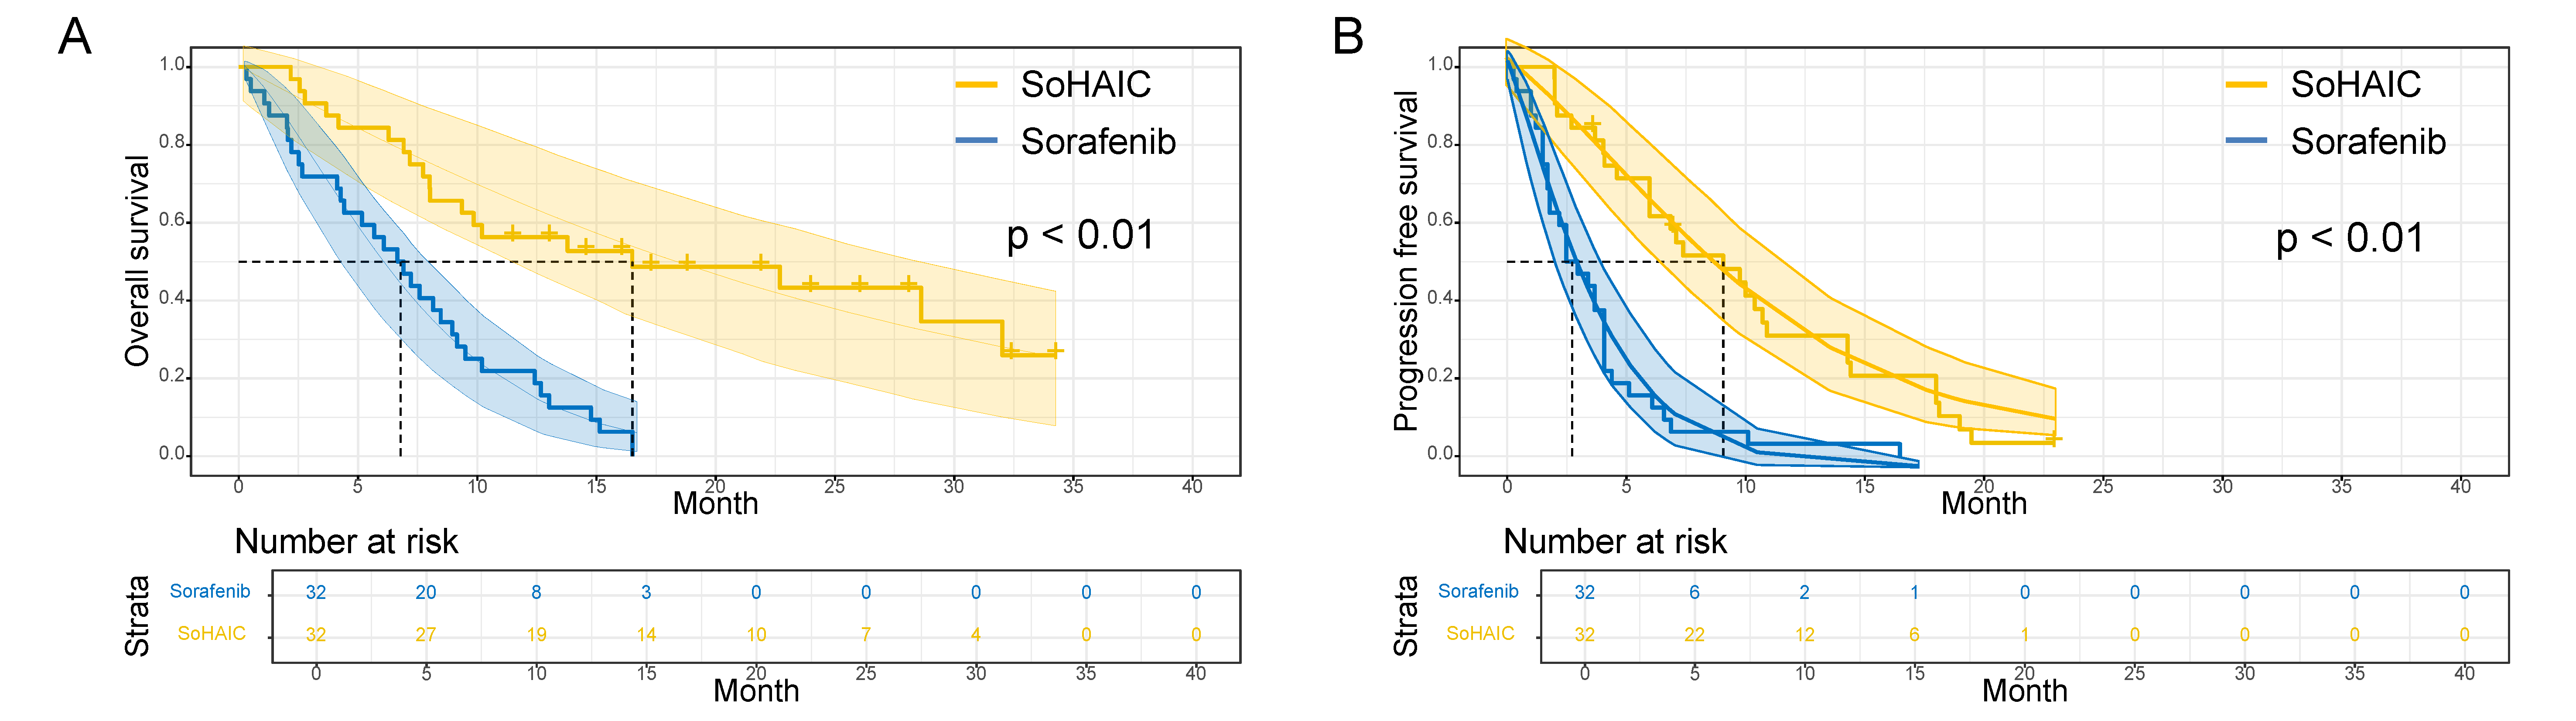


**Figure S1.** **The survival curves for SoHAIC and sorafenib.** (A) Overall survival. (B) Progression free survival. SoHAIC: sorafenib plus hepatic artery infusion chemotherapy.
